# Supplementary material
Source: PubMed Central journal article supplement (PMC8435053)
Supplement: NIHMS1672855-supplement-1.pdf [file NIHMS1672855-supplement-1.pdf]

Supplemental Table S1

*Bivariate Correlations Among All Study Variables*

|                           | 1.    | 2.     | 3.     | 4.     | 5.     | 6.     | 7.    | 8.     | 9.     | 10.   | 11.   |
|---------------------------|-------|--------|--------|--------|--------|--------|-------|--------|--------|-------|-------|
| 1. Sex                    | --    |        |        |        |        |        |       |        |        |       |       |
| 2. Social class           | -.02  | --     |        |        |        |        |       |        |        |       |       |
| 3. Education              | -.04* | .28**  | --     |        |        |        |       |        |        |       |       |
| 4. Neuroticism (S)        | .05** | -.02   | -.03   | --     |        |        |       |        |        |       |       |
| 5. Extraversion (S)       | .04*  | .00    | -.02   | -.35** | --     |        |       |        |        |       |       |
| 6. Openness (S)           | -.06* | .12**  | .19**  | -.05** | .14**  | --     |       |        |        |       |       |
| 7. Agreeableness (S)      | .17** | -.06** | -.01   | -.06** | .22**  | .26**  | --    |        |        |       |       |
| 8. Conscientiousness (S)  | .04*  | .03*   | .18**  | -.11** | .00    | .37**  | .40** | --     |        |       |       |
| 9. Neuroticism (M)        | .08** | -.12** | -.15** | .16**  | .02    | -.08** | -.02  | -.14** | --     |       |       |
| 10. Extraversion (M)      | -.02  | .08**  | .03    | -.24** | .20**  | .06**  | .05** | .02    | -.45** | --    |       |
| 11. Agreeableness (M)     | .04*  | .10**  | .13**  | -.07** | -.09** | .05**  | .01   | .13**  | -.54** | .32** | --    |
| 12. Conscientiousness (M) | .08** | .10**  | .22**  | -.10** | -.06** | .12**  | .02   | .18**  | -.47** | .28** | .46** |
| 13. Vocabulary (16)       | .01   | .26**  | .35**  | -.03   | -.06** | .20**  | -.03  | .13**  | -.14** | .03*  | .16** |
| 14. Reading (16)          | .02   | .31**  | .43**  | -.04   | .00    | .26**  | -.03  | .19**  | -.16** | .10** | .23** |
| 15. Spelling (16)         | .16** | .15**  | .20**  | -.03   | -.04** | .13**  | .03   | .15**  | -.09** | .03   | .16** |
| 16. Math (16)             | -.03  | .27**  | .37**  | -.06** | -.02   | .23**  | -.05* | .20**  | -.15** | .12** | .18** |
| 17. Matrices (16)         | .04   | .17**  | .25**  | .01    | .00    | .15**  | -.03  | .09**  | -.07** | .06** | .11** |
| 18. Memory (46)           | .03   | .16**  | .26**  | -.02   | .02    | .13**  | .01   | .08**  | -.07** | .08** | .10** |
| 19. Fluency (46)          | .02   | .17**  | .22**  | -.03   | .07**  | .12**  | .01   | .06**  | -.05** | .07** | .09** |
| 20. Speed (46)            | .10** | .06**  | .06**  | -.02   | .05**  | .09**  | .02   | .06**  | -.01   | .03   | .03   |

|                           | 12.   | 13.   | 14.   | 15.   | 16.   | 17.   | 18.   | 19.   | 20. |
|---------------------------|-------|-------|-------|-------|-------|-------|-------|-------|-----|
| 12. Conscientiousness (M) | --    |       |       |       |       |       |       |       |     |
| 13. Vocabulary (16)       | .24** | --    |       |       |       |       |       |       |     |
| 14. Reading (16)          | .26** | .76** | --    |       |       |       |       |       |     |
| 15. Spelling (16)         | .22** | .44** | .56** | --    |       |       |       |       |     |
| 16. Math (16)             | .29** | .62** | .69** | .51** | --    |       |       |       |     |
| 17. Matrices (16)         | .16** | .38** | .48** | .32** | .47** | --    |       |       |     |
| 18. Memory (46)           | .16** | .28** | .34** | .19** | .28** | .19** | --    |       |     |
| 19. Fluency (46)          | .12** | .25** | .32** | .17** | .26** | .21** | .28** | --    |     |
| 20. Speed (46)            | .05*  | .07** | .09** | .08** | .10** | .07** | .08** | .16** | --  |

Note. S=self-reported personality. M=mother-rated personality. 16=cognitive tasks at age 16. 46=cognitive tasks at age 46.  
 \*p<.05. \*\*p<.01.

Supplemental Table S2

*Self-reported and Mother-rated Personality and Cognition at Age 16 Excluding Participants without Cognition at Age 46*

| Trait             | Self    |      | Mother  |      |
|-------------------|---------|------|---------|------|
|                   | $\beta$ | $p$  | $\beta$ | $p$  |
| <u>Vocabulary</u> |         |      |         |      |
| Model 1           |         |      |         |      |
| Neuroticism       | -.02    | .331 | -.09    | .000 |
| Extraversion      | -.05    | .014 | .00     | .904 |
| Openness          | .16     | .000 | --      | --   |
| Agreeableness     | .01     | .698 | .11     | .000 |
| Conscientiousness | .12     | .000 | .19     | .000 |
| Model 2           |         |      |         |      |
| Neuroticism       | .00     | .849 | -.09    | .000 |
| Extraversion      | -.05    | .011 | .01     | .520 |
| Agreeableness     | .01     | .755 | .11     | .000 |
| Conscientiousness | .09     | .000 | .17     | .000 |
| <u>Reading</u>    |         |      |         |      |
| Model 1           |         |      |         |      |
| Neuroticism       | -.02    | .446 | -.13    | .000 |
| Extraversion      | .00     | .898 | .08     | .004 |
| Openness          | .25     | .000 | --      | --   |
| Agreeableness     | -.01    | .694 | .22     | .000 |
| Conscientiousness | .19     | .000 | .25     | .000 |
| Model 2           |         |      |         |      |
| Neuroticism       | .00     | .978 | -.13    | .000 |
| Extraversion      | -.02    | .575 | .08     | .003 |
| Agreeableness     | -.01    | .617 | .22     | .000 |
| Conscientiousness | .15     | .000 | .22     | .000 |
| <u>Spelling</u>   |         |      |         |      |

Model 1

|                   |      |      |      |      |
|-------------------|------|------|------|------|
| Neuroticism       | -.03 | .162 | -.07 | .000 |
| Extraversion      | -.05 | .007 | -.01 | .426 |
| Openness          | .11  | .000 | --   | --   |
| Agreeableness     | .00  | .785 | .12  | .000 |
| Conscientiousness | .14  | .000 | .17  | .000 |

Model 2

|                   |      |      |      |      |
|-------------------|------|------|------|------|
| Neuroticism       | -.02 | .452 | -.07 | .000 |
| Extraversion      | -.05 | .010 | .00  | .809 |
| Agreeableness     | .00  | .844 | .12  | .000 |
| Conscientiousness | .11  | .000 | .16  | .000 |

Math

Model 1

|                   |      |      |      |      |
|-------------------|------|------|------|------|
| Neuroticism       | -.03 | .157 | -.11 | .000 |
| Extraversion      | -.02 | .394 | .10  | .000 |
| Openness          | .20  | .000 | --   | --   |
| Agreeableness     | -.04 | .151 | .15  | .000 |
| Conscientiousness | .17  | .000 | .26  | .000 |

Model 2

|                   |      |      |      |      |
|-------------------|------|------|------|------|
| Neuroticism       | -.02 | .428 | -.12 | .000 |
| Extraversion      | -.04 | .073 | .10  | .000 |
| Agreeableness     | -.04 | .141 | .15  | .000 |
| Conscientiousness | .14  | .000 | .23  | .000 |

Matrices

Model 1

|                   |      |      |      |      |
|-------------------|------|------|------|------|
| Neuroticism       | .01  | .661 | -.06 | .018 |
| Extraversion      | .01  | .821 | .07  | .007 |
| Openness          | .17  | .000 | --   | --   |
| Agreeableness     | -.01 | .597 | .12  | .000 |
| Conscientiousness | .08  | .003 | .18  | .000 |

Model 2

|                   |      |      |      |      |
|-------------------|------|------|------|------|
| Neuroticism       | .02  | .417 | -.07 | .014 |
| Extraversion      | -.01 | .682 | .08  | .007 |
| Agreeableness     | -.02 | .572 | .12  | .000 |
| Conscientiousness | .05  | .053 | .17  | .000 |

Composite Cognition

Model 1

|                   |      |      |      |      |
|-------------------|------|------|------|------|
| Neuroticism       | .01  | .643 | -.12 | .000 |
| Extraversion      | -.03 | .217 | .07  | .007 |
| Openness          | .26  | .000 | --   | --   |
| Agreeableness     | .02  | .571 | .21  | .000 |
| Conscientiousness | .20  | .000 | .29  | .000 |

Model 2

|                   |      |      |      |      |
|-------------------|------|------|------|------|
| Neuroticism       | .03  | .222 | -.12 | .000 |
| Extraversion      | -.05 | .054 | .08  | .002 |
| Agreeableness     | .01  | .649 | .21  | .000 |
| Conscientiousness | .16  | .000 | .26  | .000 |

---

*Note.* Coefficients are standardized beta coefficients from linear regression controlling for sex and social class. Model 1 tested self-reported and mother-rated personality separately. Model 2 tested self-reported and mother-rated personality simultaneously. Across all analyses, traits were entered in separately.

Supplemental Table S3

*Self-reported and Mother-rated Personality at age 16 and Cognition at Age 46 Controlling for Adult Educational Attainment*

| Trait             | Self    |      | Mother  |      |
|-------------------|---------|------|---------|------|
|                   | $\beta$ | $p$  | $\beta$ | $p$  |
| <u>Memory</u>     |         |      |         |      |
| Model 1           |         |      |         |      |
| Neuroticism       | -.03    | .158 | -.03    | .112 |
| Extraversion      | .04     | .017 | .08     | .000 |
| Openness          | .08     | .000 | --      | --   |
| Agreeableness     | .02     | .274 | .06     | .002 |
| Conscientiousness | .04     | .058 | .11     | .000 |
| Model 2           |         |      |         |      |
| Neuroticism       | -.02    | .251 | -.03    | .174 |
| Extraversion      | .03     | .127 | .07     | .000 |
| Agreeableness     | .02     | .296 | .06     | .002 |
| Conscientiousness | .02     | .227 | .10     | .000 |
| <u>Fluency</u>    |         |      |         |      |
| Model 1           |         |      |         |      |
| Neuroticism       | -.03    | .155 | -.01    | .576 |
| Extraversion      | .08     | .000 | .06     | .002 |
| Openness          | .08     | .000 | --      | --   |
| Agreeableness     | .02     | .227 | .05     | .010 |
| Conscientiousness | .03     | .101 | .07     | .000 |
| Model 2           |         |      |         |      |
| Neuroticism       | -.03    | .179 | -.01    | .755 |
| Extraversion      | .07     | .000 | .04     | .012 |
| Agreeableness     | .02     | .243 | .05     | .010 |
| Conscientiousness | .02     | .231 | .06     | .001 |
| <u>Speed</u>      |         |      |         |      |

|                            |      |      |      |      |
|----------------------------|------|------|------|------|
| Model 1                    |      |      |      |      |
| Neuroticism                | -.03 | .114 | .00  | .956 |
| Extraversion               | .04  | .026 | .03  | .202 |
| Openness                   | .07  | .000 | --   | --   |
| Agreeableness              | .00  | .992 | .02  | .392 |
| Conscientiousness          | .05  | .015 | .03  | .211 |
| Model 2                    |      |      |      |      |
| Neuroticism                | -.03 | .110 | .00  | .816 |
| Extraversion               | .04  | .046 | .02  | .412 |
| Agreeableness              | .00  | .981 | .02  | .392 |
| Conscientiousness          | .05  | .022 | .02  | .344 |
| <u>Composite Cognition</u> |      |      |      |      |
| Model 1                    |      |      |      |      |
| Neuroticism                | -.04 | .036 | -.02 | .348 |
| Extraversion               | .08  | .000 | .08  | .000 |
| Openness                   | .12  | .000 | --   | --   |
| Agreeableness              | .03  | .157 | .07  | .000 |
| Conscientiousness          | .06  | .004 | .10  | .000 |
| Model 2                    |      |      |      |      |
| Neuroticism                | -.04 | .050 | -.01 | .569 |
| Extraversion               | .07  | .000 | .07  | .000 |
| Agreeableness              | .03  | .174 | .07  | .001 |
| Conscientiousness          | .04  | .023 | .09  | .000 |

*Note.* Coefficients are standardized beta coefficients from linear regression controlling for sex, childhood social class, and adult educational attainment. Model 1 tested self-reported and mother-rated personality separately. Model 2 tested self-reported and mother-rated personality simultaneously. Across all analyses, traits were entered in separately.
